# Supplementary material
Source: PubMed Central journal article supplement (PMC6834910)
Supplement: NIHMS1538559-supplement-1.pdf [file NIHMS1538559-supplement-1.pdf]

## SUPPLEMENTAL INFORMATION

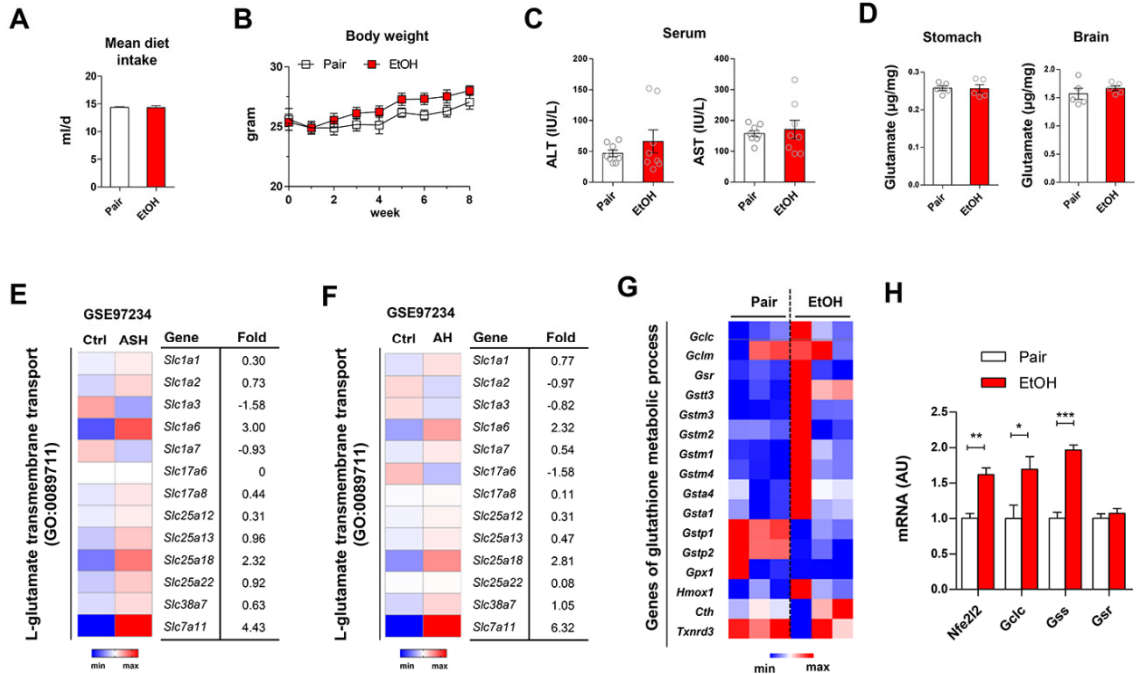

**Figure S1. Related Figure 1. Induction of hepatic glutamate transporter xCT and glutathione synthetic gene expression by alcohol consumption.**

(A) Mean diet intake of WT C57BL/6J mice fed with Pair or EtOH diet for 8 weeks ( $n = 8/\text{group}$ ; 2 replicates).

(B) Body weight changes ( $n = 8/\text{group}$ ).

(C) Serum levels of AST and ALT ( $n = 8/\text{group}$ ).

(D) Glutamate concentrations in stomach and brain ( $n = 5/\text{group}$ ) of WT mice fed with Pair or EtOH diet for 8 weeks.

(E and F) RNA sequencing data (GEO accession number: GSE97234) of mouse livers with control ( $n = 3$ ), alcoholic steatohepatitis (ASH,  $n = 3$ ) and alcoholic hepatitis (AH,  $n = 3$ ). Heatmap representation of genes annotated by GO:0089711 (L-glutamate transmembrane transport) in control vs ASH (A) or AH (B).

(G) Heatmap showing differentially expressed genes related to glutathione metabolic processes in WT mice ( $n = 3/\text{group}$ ).

(H) Relative mRNA expression of *Nfe2l2*, *Gclc*, *Gss*, and *Gsr* in isolated HEPs from WT mice ( $n = 4/\text{group}$ ). Values represent the results from three experimental replicates.

Data are presented as mean  $\pm$  SEM. \* $P < 0.05$ , \*\* $P < 0.01$ , \*\*\* $P < 0.001$ .

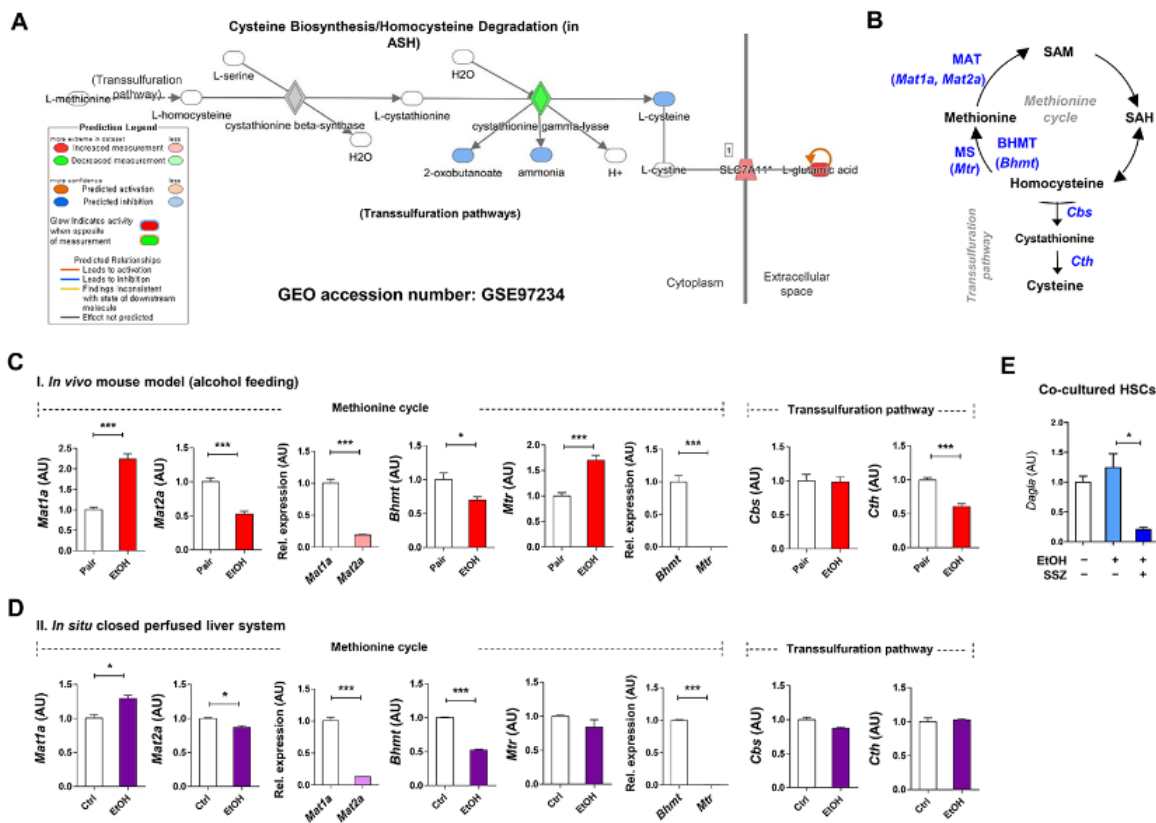

**Figure S2. Related Figure 3. mRNA expression of methionine cycle and transsulfuration pathway-related genes in the liver of pair-fed and EtOH-fed mice.**

(A) Ingenuity pathway analysis prediction of cysteine biosynthesis/homocysteine degradation metabolic pathway and xCT interaction analysis using Ingenuity Molecule Activity Predictor in control vs ASH (GEO accession number: GSE97234).

(B) Schematic methionine cycle and transsulfuration pathway and their related genes.

(C and D) Representative mRNA expression of liver tissues in WT mice of Pair ( $n = 4$ ) and EtOH ( $n = 6$ ) groups (C) and perfused liver tissues ( $n = 3$ /group) with media containing 50 mM ethanol for 2 h (D) were assessed by qRT-PCR.

(E) Relative *Dagla* mRNA expression of co-cultured HSCs with HEPs were assessed after 50 mM ethanol treatment with or without pretreatment of 100  $\mu$ M SSZ for 18 h (3 replicates).

Data are presented as mean  $\pm$  SEM. \* $P < 0.05$ , \*\* $P < 0.01$ , \*\*\* $P < 0.001$ .

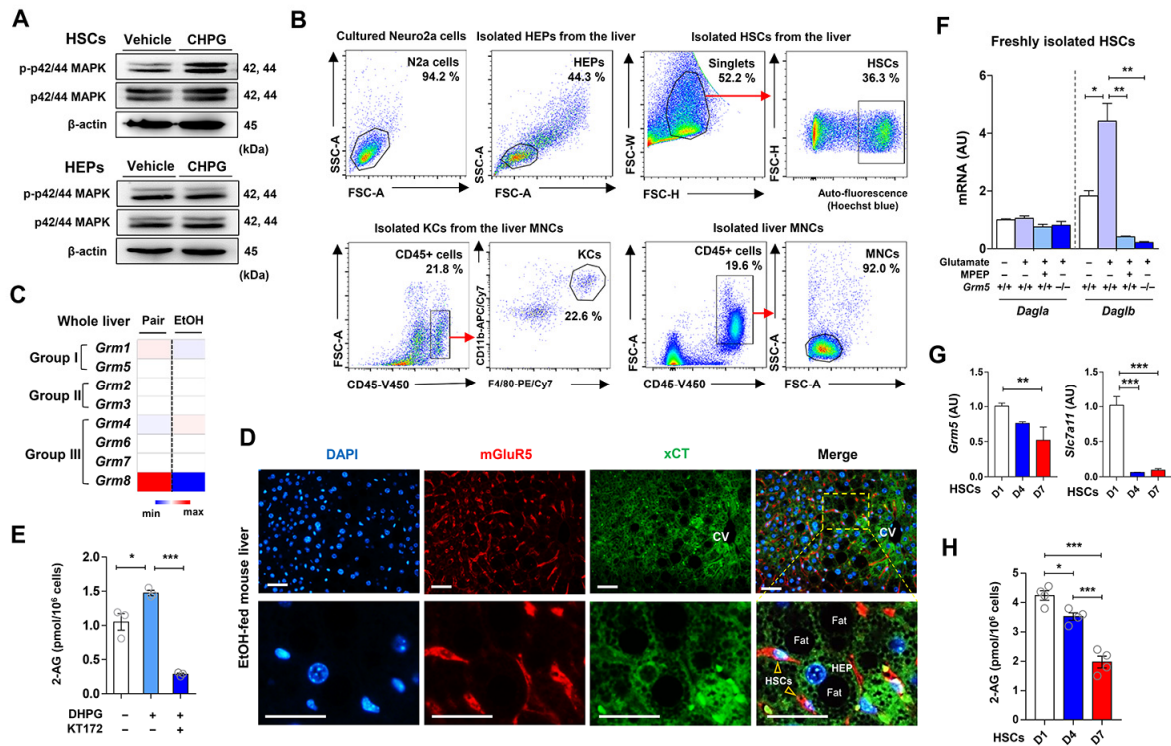

**Figure S3. Related Figure 4. Expression of mGluRs in the liver and DAGL $\beta$ -dependent 2-AG production of HSCs.**

(A) Representative western blotting analysis of MAPK in HSCs and HEPs by 10  $\mu$ M CHPG for 30 min.

(B) Gating strategy of flow cytometry for Neuro-2a (N2a) cells, HEPs, HSCs, Kupffer cells and liver MNCs. HSCs were purified depending on auto-fluorescence. Among liver MNCs, Kupffer cells were further analyzed with antibodies of CD45, F4/80, and CD11b.

(C) RNA sequencing data of mGluRs in mouse livers of Pair and EtOH groups ( $n = 3$ /group).

(D) Representative immunofluorescent staining of mGluR5 and xCT in livers of EtOH-fed mice.

(E) 2-AG production of HSCs by 10  $\mu$ M DHPG for 1 h with or without 15 min pretreatment of 2  $\mu$ M KT172, DAGL $\beta$  specific inhibitor ( $n = 3$ /each, 2 replicates).

(F) Relative mRNA levels of *Dagla* and *Daglb* genes in primary HSCs isolated from WT and mGluR5<sup>-/-</sup> mice. HSCs were incubated with vehicle or 50  $\mu$ M MSG for 30 min. 10  $\mu$ M MPEP were treated 30 min prior to the treatment with MSG (3 replicates).

(G) Relative mRNA levels of *Grm5* and *Slc7a11* genes in cultured WT HSCs for 7 days (4 replicates).

(H) 2-arachidonoylglycerol (2-AG) levels in HSCs as in (G).

Data are presented as mean  $\pm$  SEM. \* $P < 0.05$ , \*\* $P < 0.01$ , \*\*\* $P < 0.001$ . Scale bars, 25  $\mu$ m.

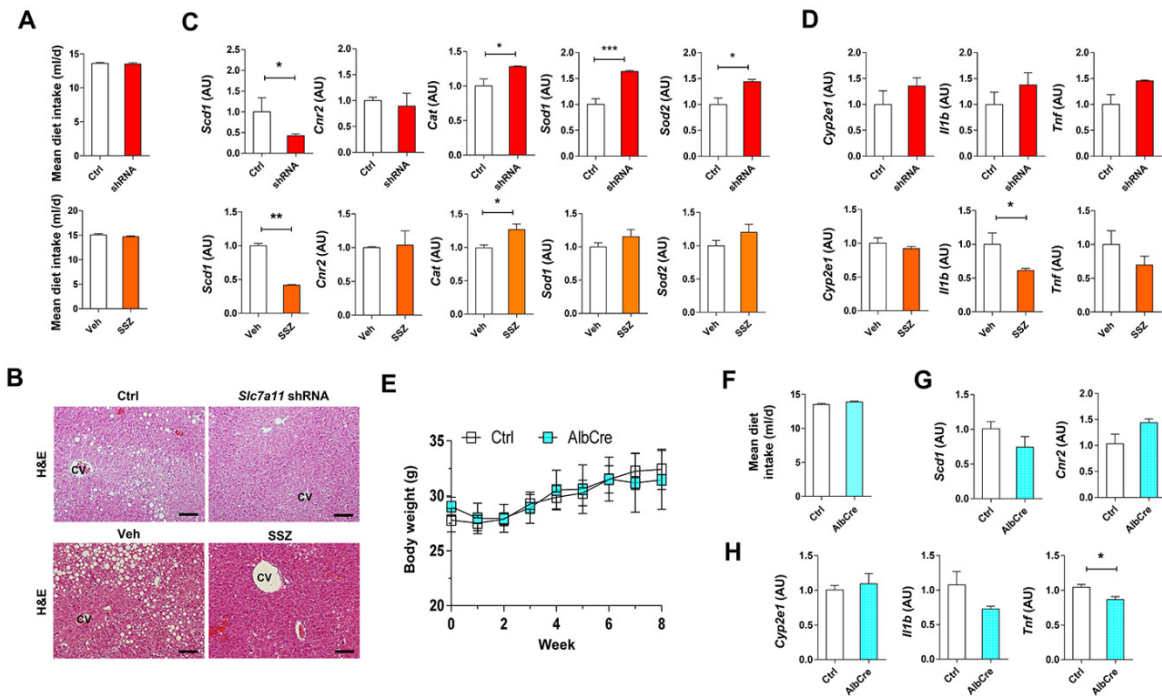

**Figure S4. Related Figure 5. Inhibition of hepatic xCT by *Slc7a11* shRNA, sulfasalazine or genetic depletion attenuates alcoholic steatosis.**

(A) Mean diet intake (ml/day) of shRNA- ( $n = 5/\text{group}$ ; 2 replicates) or SSZ- ( $n = 4/\text{group}$ ; 2 replicates) treated mice with their corresponding controls during entire experimental periods.

(B) Representative H&E stainings on the liver tissue sections of shRNA- or SSZ-treated mice with their corresponding controls.

(C) Hepatic mRNA expression of *Scd1*, *Cnr2*, *Cat*, *Sod1*, and *Sod2* in shRNA- or SSZ-treated mice with their corresponding controls.

(D) Hepatic mRNA expression of *Cyp2e1*, *Il1b* and *Tnf* in shRNA- or SSZ-treated mice and their corresponding controls.

(E) Body weight changes of WT control and hepatocyte-specific xCT KO (AlbCre) mice.

(F) Mean diet intake (ml/day) of WT and AlbCre mice ( $n = 4/\text{group}$ ; 2 replicates) during entire experimental periods.

(G-H) Hepatic mRNA expression of *Scd1*, *Cnr2*, *Cyp2e1*, *Il1b*, and *Tnf* in WT and AlbCre mice ( $n = 4/\text{group}$ ).

Data are presented as mean  $\pm$  SEM. \* $P < 0.05$ , \*\* $P < 0.01$ , \*\*\* $P < 0.001$ . Scale bars, 50  $\mu\text{m}$ .

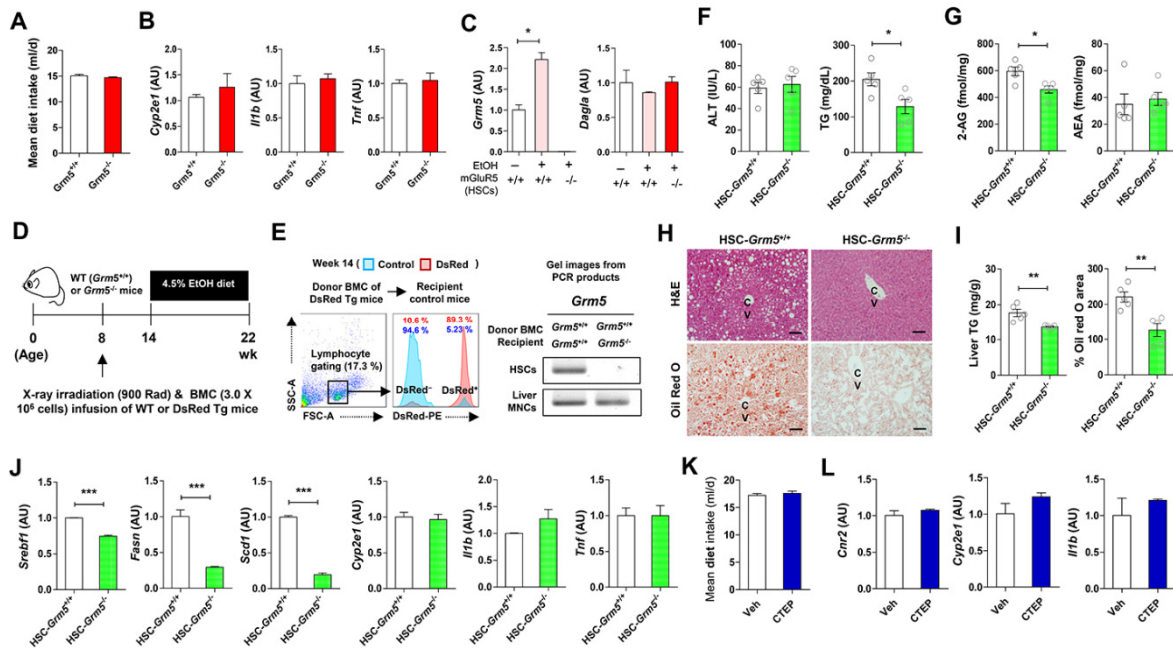

**Figure S5. Related Figure 6. Effects of genetic or pharmacologic inhibition of mGluR5 in alcoholic steatosis.**

(A-B) *Grm5*<sup>-/-</sup> and *Grm5*<sup>+/+</sup> mice were fed with ethanol diet for 8 weeks ( $n = 5/\text{group}$ ; 3 replicates). Volume of mean diet intake (A), and representative hepatic expression of *Cnr2*, *Cyp2e1*, *Il1b* and *Tnf* mRNA levels (B) were measured.

(C) Representative *Grm5* and *Dagla* mRNA expression in co-cultured HSCs was assessed by qRT-PCR (3 replicates).

(D-J) Schematic for the experimental protocol. Chimeric mice were generated by bone marrow cell (BMC) transplantation isolated from *Grm5*<sup>+/+</sup> mice to *Grm5*<sup>-/-</sup> and *Grm5*<sup>+/+</sup> mice. 8 weeks old mice were irradiated with X-ray (900 Rad) and then infused with  $3 \times 10^6$  BMCs of WT or DsRed Tg mice via tail vein injection. At week 6 after BMC transplantation, mice were fed with ethanol diet for additional 8 weeks ( $n = 5/\text{group}$ ; 2 replicates).

(E) After BMC transplantation, FACS and PCR analyses were performed on isolated liver MNCs and HSCs to confirm chimerism. Depending on *Grm5* depletion in HSCs, mice were designated as HSC-*Grm5*<sup>+/+</sup> or HSC-*Grm5*<sup>-/-</sup>.

(F) Representative serum levels of ALT, and TG were assessed ( $n = 5/\text{group}$ ; 2 replicates).

(G) Representative hepatic levels of 2-AG and AEA were measured ( $n = 5/\text{group}$ ; 2 replicates).

(H) Representative H&E and Oil Red O stainings.

(I) Representative liver TG levels and percentage of Oil Red O-stained areas ( $n = 5/\text{group}$ ; 2 replicates).

(J) Representative expression of *Srebf1*, *Fasn*, *Scd1*, *Cyp2e1*, *Il1b* and *Tnf* mRNA levels ( $n = 3/\text{group}$ ; 2 replicates).

(K and L) CTEP ( $2 \text{ mg kg}^{-1}$  body weight) was administered to WT mice per os every other day for the last four weeks of ethanol feeding ( $n = 7/\text{group}$ ). Volume of mean diet intake (K), and representative hepatic expression of *Cnr2*, *Cyp2e1*, and *Il1b* mRNA levels (L) were measured (3 replicates).

Data are presented as mean  $\pm$  SEM. \* $P < 0.05$ , \*\* $P < 0.01$ , \*\*\* $P < 0.001$ . Scale bars, 50  $\mu\text{m}$ .

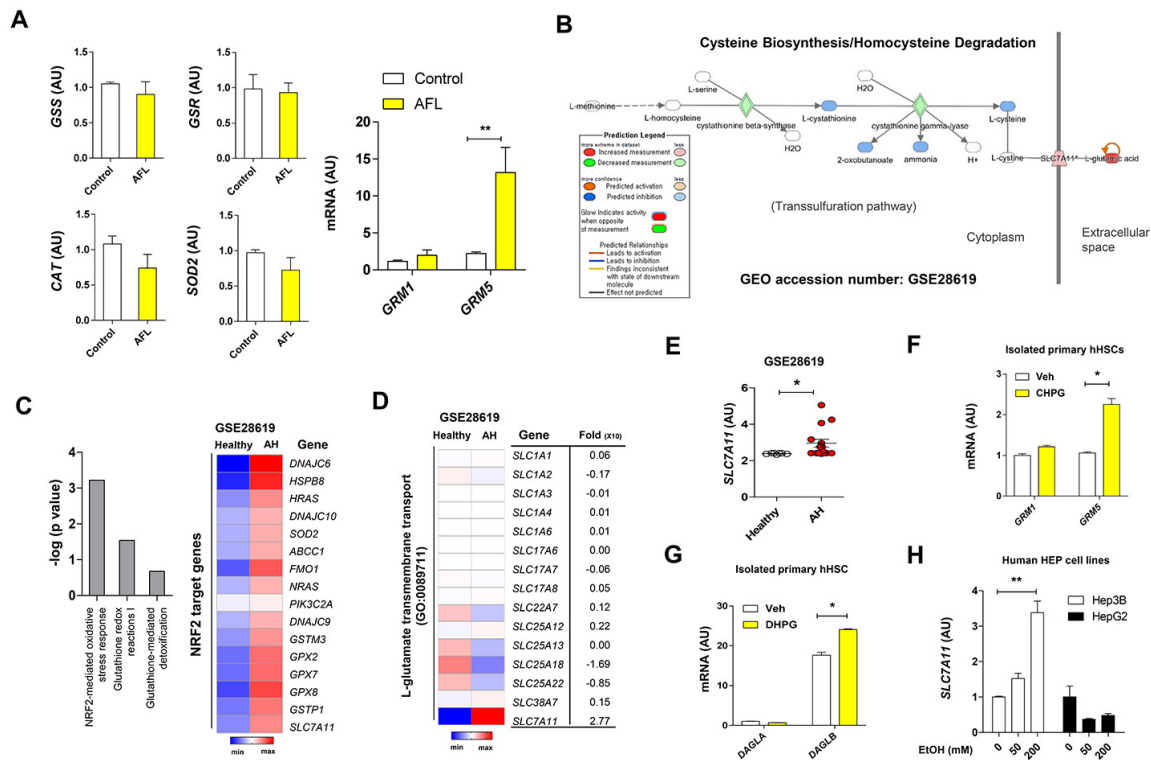

**Figure S6. Related Figure 7. Increased hepatic mRNA expression of *GRM5*, *SLC7A11*, and *DAGLB* genes in patients with AFL.**

(A) Relative mRNA levels of *GSS*, *GSR*, *CAT*, *SOD2*, *GRM1* and *GRM5* genes in controls ( $n = 4$ ) and patients with AFL ( $n = 4$ ).

(B) Ingenuity Pathway Analysis prediction of cysteine biosynthesis/homocysteine degradation metabolic pathway and xCT interaction analysis using Ingenuity Molecule Activity Predictor in patients with AH (GEO accession number: GSE28619).

(C-E) IPA of canonical pathways most enriched in sets of genes of the liver from patients with AH and heatmap representation of genes controlled by NRF2 (C), heatmap representation of genes annotated by GO:0089711 (L-glutamate transmembrane transport) (D), and relative *SLC7A11* mRNA expression (E) in healthy controls and patients with AH (GEO accession number: GSE28619).

(F) Relative mRNA levels of *GRM1* and *GRM5* genes in isolated primary hHSCs treated with 10  $\mu$ M CHPG for 30 min (3 replicates).

(G) Relative mRNA levels of *DAGLA* and *DAGLB* genes in isolated primary hHSCs treated with vehicle or 10  $\mu$ M DHPG for 30 min (3 replicates).

(H) Relative expression of *SLC7A11* mRNA in Hep3B cells and HepG2 cells after treatment with or without 50 mM ethanol for 24 h (3 replicates).

Data are presented as mean  $\pm$  SEM. \* $P < 0.05$ , \*\* $P < 0.01$ .

**Table S1. Related Figure 7. Clinical characteristics of patients with alcoholic liver disease.**

| Variables                               | Mean ± SEM or percentage |              |              |              |              |                 |
|-----------------------------------------|--------------------------|--------------|--------------|--------------|--------------|-----------------|
|                                         | Healthy (n=4)            | AWLD (n=8)   | AFL (n=6)    | ASH (n=6)    | ALC (n=6)    | ASH on LC (n=7) |
| Age (years)                             | 35.0±1.1                 | 60.7±4.3     | 64.7±4.2     | 49.7±6.8     | 56.5±5.0     | 59.2±4.2        |
| Male (%)                                | 100                      | 100          | 100          | 83           | 100          | 86              |
| Body weight (kg)                        | 75.0±2.7                 | 61.6±2.7     | 64.4±4.3     | 59.1±2.9     | 67.9±5.2     | 66.8±7.4        |
| MDF                                     | -                        | 5.0±1.2      | 3.8±1.0      | 14.4±7.7     | 24.8±6.4     | 29.8±11.1       |
| MELD score                              | -                        | 6.1±0.6      | 5.3±0.9      | 12.5±2.5     | 12.7±2.3     | 16.1±2.4        |
| ABIC score                              | -                        | 7.3±0.4      | 7.6±0.4      | 6.6±0.7      | 7.3±0.3      | 7.8±0.6         |
| Alcohol intake (g/d)                    | 4.0±2.1                  | 64.1±11.5    | 99.6±24.2    | 82.5±24.3    | 130.9±46.4   | 110.7±26.6      |
| Creatinine (mg/dl)                      | 1.00±0.06                | 0.83±0.05    | 0.85±0.07    | 0.89±0.19    | 0.81±0.06    | 0.69±0.06       |
| AST (U/L)                               | 23.3±0.6                 | 21.7±1.8     | 23.7±5.2     | 96.7±29.1    | 55.3±12.3    | 108.2±17.3      |
| ALT (U/L)                               | 22.3±2.3                 | 18.7±5.4     | 13.8±2.8     | 62.7±18.8    | 28.5±7.4     | 34.4±5.9        |
| GGT (U/L)                               | 21.3±1.8                 | 56.7±20.8    | 55.2±14.5    | 376.2±93.2   | 85.0±31.5    | 264.4±106.8     |
| Bilirubin (mg/dl)                       | 0.80±0.06                | 0.73±0.09    | 0.68±0.17    | 5.43±3.71    | 2.63±1.28    | 4.62±1.18       |
| Albumin (mg/dl)                         | 4.58±0.03                | 4.00±0.13    | 3.90±0.22    | 3.53±0.25    | 3.37±0.33    | 3.08±0.23       |
| Platelet count (×10 <sup>3</sup> /μl)   | 191.8±11.6               | 207.0±11.6   | 167.8±26.9   | 183.2±38.6   | 95.8±26.4    | 174.2±96.3      |
| Leucocytes count (×10 <sup>3</sup> /μl) | 5.83±0.66                | 5.44±0.41    | 6.47±0.81    | 6.67±0.82    | 5.59±1.07    | 8.69±3.53       |
| ANC (mm <sup>3</sup> )                  | 3097.2±181.0             | 3163.1±401.0 | 4100.2±585.4 | 4122.0±668.6 | 3532.8±789.7 | 6428.0±3316.2   |
| PT INR                                  | -                        | 1.10±0.02    | 1.07±0.03    | 1.22±0.09    | 1.51±0.12    | 1.57±0.24       |

Abbreviations: ABIC score, age-bilirubin-INR-creatinine score; AFL, alcoholic fatty liver; ALC, alcoholic liver cirrhosis; ALT, alanine aminotransferase; ANC, absolute neutrophil count; ASH, alcoholic steatohepatitis; AST, aspartate aminotransferase; AWLD, alcoholics without liver disease; GGT, gamma-glutamyl transferase; LC, liver cirrhosis; MDF, Maddrey's discriminant function; MELD, model for end-stage liver disease; PT INR, prothrombin time international normalized ratio

**Table S2. Related Figure 7. Clinical characteristics of patients with fresh liver biopsy samples.**

| Patients                   |                       | Ctrl#1  | Ctrl#2  | Ctrl#3                  | Ctrl#4  | AFL#1    | AFL#2    | AFL#3    | AFL#4    |
|----------------------------|-----------------------|---------|---------|-------------------------|---------|----------|----------|----------|----------|
| <b>Clinical parameters</b> | Age                   | 32      | 70      | 71                      | 56      | 74       | 71       | 59       | 34       |
|                            | Sex                   | F       | M       | M                       | M       | M        | M        | M        | M        |
|                            | Alcohol intake (gr/d) | 0       | 7.0     | 0                       | 0       | 37.7     | 141.3    | 78.5     | 56.5     |
|                            | ALT (IU/L)            | 9       | 27      | 38                      | 12      | 27       | 15       | 11       | 45       |
|                            | PT INR                | 1.00    | 1.00    | 0.90                    | 1.10    | 1.12     | 1.14     | 0.95     | 1.00     |
|                            | Bilirubin (mg/dl)     | 0.9     | 1.6     | 0.8                     | 2.3     | 0.5      | 0.7      | 0.5      | 1.0      |
|                            | Albumin (mg/dl)       | 3.8     | 3.7     | 4.5                     | 4.3     | 3.8      | 4.2      | 4.5      | 3.5      |
|                            | Creatinine (mg/dl)    | 0.70    | 0.99    | 0.55                    | 0.91    | 0.87     | 0.91     | 1.00     | 0.66     |
| <b>Pathology</b>           | Steatosis             | No      | No      | Mild                    | No      | Moderate | Moderate | Moderate | Moderate |
|                            | Lobular inflammation  | No      | No      | No                      | Mild    | No       | Mild     | No       | No       |
|                            | Hepatocyte ballooning | No      | No      | No                      | No      | No       | Mild     | No       | No       |
| <b>Remarks</b>             | WB, PCR               | WB, PCR | WB, PCR | WB, PCR, Cell isolation | WB, PCR | WB, PCR  | WB, PCR  | WB, PCR  |          |

Abbreviations: AFL, alcoholic fatty liver; ALT, alanine aminotransferase; Ctrl, Control; PT INR, prothrombin time international normalized ratio. † Remarks. **Ctrl#1**: patient with liver resection for focal nodular hyperplasia; **Ctrl#2**: patient with liver resection for hepatocellular carcinoma in normal liver; **Ctrl#3**: patient with liver resection for hepatocellular carcinoma in mild steatotic liver; **Ctrl#4**: inactive carrier for hepatitis B with liver resection for hepatocellular carcinoma without any evidence of advanced fibrosis or cirrhosis



**Table S3. Related to STAR Methods. Primer sequences for qPCR.****For qPCR in mouse samples:**

| <b>Genes</b>   | <b>Forward</b>                    | <b>Reverse</b>                 |
|----------------|-----------------------------------|--------------------------------|
| <i>18S</i>     | ACA GGA TTG ACA GAT TGA TAG C     | GCC AGA GTC TCG TTC GTT A      |
| <i>Actb</i>    | GTT ACC AAC TGG GAC GAC           | CTC AAA CAT GAT CTG GGT CA     |
| <i>Aldh4a1</i> | TGC AGC CGA ACT CAT CGA CTT       | TGC CAG GTT GCC TCC AAT C      |
| <i>Bhmt</i>    | CTC AGA GCT GGA TCG AAC GTC       | CCG TGC AAT GTC ACA AGC AG     |
| <i>Cat</i>     | GGA GGC GGG AAC CCA ATA G         | GTG TGC CAT CTC GTC AGT GAA    |
| <i>Cbs</i>     | GGA AAA TTG GGA ACA CCC CTA T     | CCA CCC GCA TTG AAG AAC TCA    |
| <i>Cnr1</i>    | ACA GGG CAG TAC CCC TTC TT        | AGC CCC TGG TGG TAT TCT CT     |
| <i>Cnr2</i>    | ACG GTG GCT TGG AGT TCA AC        | GCC GGG AGG ACA GGA TAA T      |
| <i>Cth</i>     | TTG GAT CGA AAC ACC CAC AAA       | AGC CGA CTA TTG AGG TCA TCA    |
| <i>Cyp2e1</i>  | CCA CCC TCC TCC TCG TAT           | CTT GAC AGC CTT GTA GCC        |
| <i>Dagla</i>   | TTC GCC GAG TTC ATT GAC AG        | TCT CAG GCA CCA TCA TGC A      |
| <i>Daglb</i>   | AGC GAC GAC TTG GTG TTC C         | GCG TGA GAT ACA ACG TCA GAC T  |
| <i>Fasn</i>    | TGG GTT CTA GCC AGC AGA GT        | ACC ACC AGA GAC CGT TAT GC     |
| <i>Gclc</i>    | GGA CAA ACC CCA ACC ATC C         | GTT GAA CTC AGA CAT CGT TCC T  |
| <i>Glud1</i>   | CCC AAC TTC TTC AAG ATG GTG G     | AGA GGC TCA ACA CAT GGT TGC    |
| <i>Glul</i>    | TGA ACA AAG GCA TCA AGC AAA TG    | CAG TCC AGG GTA CGG GTC TT     |
| <i>Gls1</i>    | CTA CAG GAT TGC GAA CAT CTG AT    | ACA CCA TCT GAC GTT GTC TGA    |
| <i>Gls2</i>    | TCA GGC ATT CCG AAA GAA GTT T     | CAG AAG GGG ATC TTC GTG TGG    |
| <i>Grm1</i>    | TGG AAC AGA GCA TTG AGT TCA TC    | CAA TAG GCT TCT TAG TCC TGC C  |
| <i>Grm5</i>    | AGA AAC CCA TAG TGG GAG TCA T     | ATG CTA GTT GCA GAG TAA GCA AT |
| <i>Gsr</i>     | GCG TGA ATG TTG GAT GTG TAC C     | GTT GCA TAG CCG TGG ATA ATT TC |
| <i>Gss</i>     | GGG CCT GAA TCG CTC AGA TTA       | CAG GAC ATT GAG AAC GTG TCG    |
| <i>Il1b</i>    | GCC CAT CCT CTG TGA CTC AT        | AGG CCA CAG GTA TTT TGT CG     |
| <i>Mat1a</i>   | GTG CTG GAT GCT CAC CTC AAG       | CCA CCC GCT GGT AAT CAA CC     |
| <i>Mat2a</i>   | CAA CAA GAC CCT GAT GCT AAA GT    | AGG CAA CCA ACA CAT TAC AAG T  |
| <i>Mtr</i>     | TCC TCC TCG GCC TAT CTT TAT TT    | GGT CCG AAT GAG ACA CGC T      |
| <i>Nfe2l2</i>  | CTT TAG TCA GCG ACA GAA GGA C     | AGG CAT CTT GTT TGG GAA TGT G  |
| <i>Oat</i>     | TGC CAC CCA AAG ATC ATA GAT GC    | TGT ACT CCT CGT ATT CAC CAA GG |
| <i>Prodh</i>   | ATC CGG CAC AAC AAA GCC TT        | GCT TCA TTG GCA TAG AAG TAG GT |
| <i>Pycr2</i>   | TCC TGT ATC CGA ACC AGA GA        | GGG TTT CTT GTA AGG AGT TT     |
| <i>Scd1</i>    | TTC TTG CGA TAC ACT CTG GTG C     | CGG GAT TGA ATG TTC TTG TCG T  |
| <i>Slc7a11</i> | GAT GGT CCT AAA TAG CAC GAG TG    | GGG CAA CCC CAT TAG ACT TGT    |
| <i>Sod1</i>    | AAC CAG TTG TGT TGT CAG GAC       | CCA CCA TGT TTC TTA GAG TGA GG |
| <i>Sod2</i>    | CAG ACC TGC CTT ACG ACT ATG G     | CTC GGT GGC GTT GAG ATT GTT    |
| <i>Srebf1</i>  | CTT AAC GTG GGC CTA GTC CGA AGC C | CCA GTT CGC ACA TCT CGG CCA    |
| <i>Tnf</i>     | AAG CCT GTA GCC CAC GTC GTA       | AAG GTA CAA CCC ATC GGC TGG    |

**For qPCR in human samples:**

| <b>Genes</b>   | <b>Forward</b>                  | <b>Reverse</b>                    |
|----------------|---------------------------------|-----------------------------------|
| <i>ACTB</i>    | AGC GAG CAT CCC CCA AAG TT      | GGG CAC GAA GGC TCA TCA TT        |
| <i>ALDH4A1</i> | CCA TCT CGC CCT TTA ACT TCA C   | ACT GGG CTT CCA TAG GAC CA        |
| <i>CAT</i>     | GTT ACT CAG GTG CGG GCA TTC TAT | GAA GTT CTT GAC CGC TTT CTT CTG   |
| <i>CBS</i>     | GGG GCT GAG ATT GTG AGG AC      | CGG TAC TGG TCT AGG ATG TGA       |
| <i>CNRI</i>    | TTA CAA CAA GTC TCT CTC GTC CT  | GGC TGC CGA TGA AGT GGT A         |
| <i>CTH</i>     | CAT GAG TTG GTG AAG CGT CAG     | AGC TCT CGG CCA GAG TAA ATA       |
| <i>DAGLA</i>   | CCT CAC TGC CAA GAA TGT CA      | CAG GTT GTA GGT CCG CAG GTT A     |
| <i>DAGLB</i>   | AGT CTG TTG TGG TCG CTG TG      | AAT CCC GTC GTT GAT GAG TC        |
| <i>FASN</i>    | TGC TCC CAG CTG CAG GC          | GCC CGG TAG CTC TGG GTG TA        |
| <i>GCLC</i>    | GGA GAC CAG AGT ATG GGA GTT     | CCG GCG TTT TCG CAT GTT G         |
| <i>GRM1</i>    | CCA GCG ATC TTT TTG GAG GTG     | TGG TGA TGG ACT GAG AAG AGG       |
| <i>GRM5</i>    | ATG CCG GGT GAC ATC ATT ATT G   | TGA ATG CCA TAC TGT TCA CGG       |
| <i>GSR</i>     | ATC CCC GGT GCC AGC TTA GG      | AGC AAT GTA ACC TGC ACC AAC AA    |
| <i>GSS</i>     | ACT CAC TGG ATG TGG GTG AAG AAG | TCC TCC CCA TAT AGG TTG TTA CCT C |
| <i>SLC7A11</i> | GGT CCA TTA CCA GCT TTT GTA CG  | AAT GTA GCG TCC AAA TGC CAG       |
| <i>SOD2</i>    | CTC CCC GAC CTG CCC TAC GAC TAC | AAA CCA AGC CAA CCC CAA CCT GAG   |
| <i>SREBF1</i>  | CGG AAC CAT CTT GGC AAC AGT     | CGC TTC TCA ATG GCG TTG T         |

**Table S4. Related to STAR Methods. Summary of the statistics for the main figures with statistical significance**

| Figures                             | Sample (size)         | Statistical method                      | Statistical values                                 |
|-------------------------------------|-----------------------|-----------------------------------------|----------------------------------------------------|
| Figure 1A                           | Pair, n=8; EtOH, n=8  | Unpaired t-test, two-sided              | Serum: df=14, t=4, P<0.01                          |
|                                     | Pair, n=8; EtOH, n=8  |                                         | Liver: df=14, t=4.15, P<0.01                       |
| Figure 1B                           | Pair, n=8; EtOH, n=8  | Linear regression                       | Liver TG: r <sup>2</sup> =0.62, P<0.001            |
|                                     | Pair, n=8; EtOH, n=8  |                                         | <i>Fasn</i> mRNA: r <sup>2</sup> =0.80, P<0.001    |
| Figure 1G                           | 3 biologic replicates | One-way ANOVA with multiple comparisons | Column A vs. B, q=10.22, adjusted P<0.001          |
|                                     |                       |                                         | Column A vs. C, q=28.76, adjusted P<0.001          |
| Figure 1H                           | Pair, n=8; EtOH, n=8  | Unpaired t-test, two-sided              | df=14, t=6.254, P<0.001                            |
| Figure 2A                           | Pair, n=8; EtOH, n=8  | Unpaired t-test, two-sided              | <i>Glul1</i> : df=14, t=7.62, P<0.001              |
|                                     |                       |                                         | <i>Oat</i> : df=14, t=6.34, P<0.001                |
|                                     |                       |                                         | <i>Aldh4a1</i> : df=14, t=6.37, P<0.001            |
|                                     |                       |                                         | <i>Glul</i> : df=14, t=6.11, P<0.001               |
| Figure 2B                           | Pair, n=4; EtOH, n=4  | Unpaired t-test, two-sided              | <i>Glul</i> : df=4, t=3.32, P=0.029                |
|                                     |                       |                                         | <i>Oat</i> : df=4, t=3.36, P=0.028                 |
|                                     |                       |                                         | <i>Aldh4a1</i> : df=4, t=8.52, P<0.01              |
|                                     |                       |                                         | <i>Glul1</i> : df=4, t=5.75, P<0.01                |
| Figure 2D                           | Pair, n=8; EtOH, n=8  | Unpaired t-test, two-sided              | df=14, t=2.37, P=0.033                             |
| Figure 2F                           | 3 biologic replicates | One-way ANOVA with multiple comparisons | <i>Glul1</i> : 0 vs. 50: q=3.92, adjusted P=0.0272 |
|                                     |                       |                                         | <i>Aldh4a1</i> :                                   |
|                                     |                       |                                         | 0 vs. 10: q=4.87, adjusted P=0.010                 |
|                                     |                       |                                         | 0 vs. 20: q=4.87, adjusted P=0.010                 |
|                                     |                       |                                         | 0 vs. 50, q=6.17, adjusted P=0.003                 |
|                                     |                       |                                         | 0 vs. 100, q=5.38, adjusted P=0.006                |
| 0 vs. 200, q=9.90, adjusted P<0.001 |                       |                                         |                                                    |
| Figure 3B                           | Pair, n=4; EtOH, n=6  | Unpaired t-test, two-sided              | methionine: df=8, t=3.71, P<0.01                   |
|                                     |                       |                                         | homocysteine: df=8, t=2.86, P=0.021                |
|                                     |                       |                                         | cysteine: df=8, t=5.51, P<0.001                    |
|                                     |                       |                                         | GSH: df=8, t=1.91, P=0.046                         |
|                                     |                       |                                         | homocysteine (serum): df=8, t=2.04, P=0.038        |
| Figure 3D                           | Ctrl, n=3; EtOH, n=3  | Unpaired t-test, two-sided              | methionine: df=4, t=3.77, P=0.020                  |
|                                     |                       |                                         | SAH: df=4, t=3.77, P=0.020                         |
|                                     |                       |                                         | homocysteine: df=4, t=2.97, P=0.041                |
|                                     |                       |                                         | cystathionine: df=4, t=6.13, P<0.01                |
|                                     |                       |                                         | cysteine: df=4, t=3.63, P=0.022                    |
|                                     |                       |                                         | GSH: df=4, t=5.98, P<0.01                          |
|                                     |                       |                                         | ALT: df=4, t=10, P<0.001                           |
|                                     |                       |                                         | glutamate: df=4, t=47.03, P<0.001                  |
| Figure 3F                           | 3 biologic replicates | One-way ANOVA with multiple comparisons | glutamate:                                         |
|                                     |                       |                                         | Column B vs. A, q=16.42, adjusted P<0.01           |
|                                     |                       |                                         | Column B vs. C, q=38.72, adjusted P<0.001          |
|                                     |                       |                                         | cystine:                                           |
|                                     |                       |                                         | Column B vs. A, q=3.46, adjusted P<0.05            |
|                                     |                       |                                         | Column B vs. C, q=4.23, adjusted P<0.01            |
| Figure 3G                           | 3 biologic replicates | One-way ANOVA with multiple comparisons | Column B vs. A, q=7.17, adjusted P<0.001           |
|                                     |                       |                                         | Column B vs. C, q=13.69, adjusted P<0.001          |
| Figure 3H                           | 3 biologic replicates | One-way ANOVA with multiple comparisons | <i>Cnr1</i> :                                      |
|                                     |                       |                                         | Column B vs. A, q=5.01, adjusted P<0.01            |
|                                     |                       |                                         | <i>Srebf1</i> :                                    |
|                                     |                       |                                         | Column B vs. A, q=6.22, adjusted P<0.01            |
|                                     |                       |                                         | Column B vs. C, q=5.68, adjusted P<0.01            |
|                                     |                       |                                         | <i>Fasn</i> :                                      |
|                                     |                       |                                         | Column B vs. A, q=6.00, adjusted P<0.01            |
|                                     |                       |                                         | Column B vs. C, q=11.12, adjusted P<0.001          |

|                                           |                                                                  |                                         |                                              |
|-------------------------------------------|------------------------------------------------------------------|-----------------------------------------|----------------------------------------------|
| Figure 4C                                 | n = 4 for each group                                             | One-way ANOVA with multiple comparisons | Column B vs. A, q=11.54, adjusted P<0.001    |
|                                           |                                                                  |                                         | Column B vs. C, q=10.19, adjusted P<0.001    |
|                                           |                                                                  |                                         | Column B vs. D, q=11.63, adjusted P<0.001    |
| Figure 4E                                 | 3 biologic replicates                                            | Unpaired t-test, two-sided              | df=4, t=10.56, P<0.001                       |
| Figure 4F                                 | 2 biologic replicates                                            | Unpaired t-test, two-sided              | df=2, t=5.42, P=0.032                        |
| Figure 4G                                 | 3 biologic replicates                                            | Unpaired t-test, two-sided              | df=6, t=4.53, P<0.01                         |
| Figure 4H                                 | Veh, n=5; CHPG, n=5                                              | Unpaired t-test, two-sided              | df=8, t=5.55, P<0.001                        |
| Figure 4I                                 | 4 biologic replicates                                            | Unpaired t-test, two-sided              | <i>Dagla</i> (15min): df=4, t=3.95, P=0.02   |
|                                           |                                                                  |                                         | <i>Daglb</i> (15min): df=4, t=21.58, P<0.001 |
|                                           |                                                                  |                                         | <i>Daglb</i> (30min): df=4, t=7.19, P<0.01   |
| Figure 4J                                 | 3 biologic replicates                                            | One-way ANOVA with multiple comparisons | Column B vs. A, q=4.39, adjusted P<0.01      |
|                                           |                                                                  |                                         | Column B vs. C, q=3.03, adjusted P<0.05      |
|                                           |                                                                  |                                         | Column B vs. D, q=3.54, adjusted P<0.05      |
| Figure 4K                                 | 2 biologic replicates                                            | One-way ANOVA with multiple comparisons | <i>Srebf1</i> (3hr):                         |
|                                           |                                                                  |                                         | Column B vs. A, q=4.84, adjusted P<0.01      |
|                                           |                                                                  |                                         | Column B vs. C, q=7.59, adjusted P<0.001     |
|                                           |                                                                  |                                         | <i>Srebf1</i> (6hr):                         |
|                                           |                                                                  |                                         | Column B vs. C, q=12.50, adjusted P<0.001    |
|                                           |                                                                  |                                         | <i>Fasn</i> (3hr):                           |
|                                           |                                                                  |                                         | Column B vs. C, q=4.85, adjusted P<0.01      |
|                                           |                                                                  |                                         | <i>Fasn</i> (6hr):                           |
|                                           |                                                                  |                                         | Column B vs. A, q=3.01, adjusted P<0.05      |
| Column B vs. C, q=5.04, adjusted P<0.01   |                                                                  |                                         |                                              |
| Figure 5A                                 | 2 biologic replicates                                            | Unpaired t-test, two-sided              | df = 2, t=10.66, P<0.01                      |
| Figure 5D                                 | Ctrl, n=5; shRNA, n=5                                            | Unpaired t-test, two-sided              | df=8, t=3.04, P=0.016                        |
|                                           | Veh, n=4; SSZ, n=4                                               | Unpaired t-test, two-sided              | df = 6, t=5.78, P<0.01                       |
| Figure 5E                                 | Ctrl, n=5; shRNA, n=5                                            | Unpaired t-test, two-sided              | df=8, t=8.84, P<0.001                        |
|                                           | Veh, n=4; SSZ, n=4                                               | Unpaired t-test, two-sided              | df=6, t=3.18, P=0.019                        |
| Figure 5G                                 | Ctrl, n=4; shRNA, n=4                                            | Unpaired t-test, two-sided              | <i>Cnrl1</i> : df=6, t=2.91, P=0.027         |
|                                           |                                                                  |                                         | <i>Srebf1</i> : df=6, t=3.23, P=0.018        |
|                                           |                                                                  |                                         | <i>Fasn</i> : df=6, t=2.88, P=0.028          |
|                                           | Veh, n=3; SSZ, n=3                                               | Unpaired t-test, two-sided              | <i>Cnrl1</i> : df=4, t=4.06, P=0.015         |
|                                           |                                                                  |                                         | <i>Srebf1</i> : df=4, t=6.22, P<0.01         |
| <i>Fasn</i> : df=4, t=6.47, P<0.01        |                                                                  |                                         |                                              |
| Figure 5K                                 | Ctrl, n=3; AlbCre, n=3                                           | Unpaired t-test, two-sided              | <i>Cnrl1</i> : df=6, t=5.80, P<0.01          |
|                                           |                                                                  |                                         | <i>Srebf1</i> : df=6, t=3.26, P=0.017        |
|                                           |                                                                  |                                         | <i>Fasn</i> : df=6, t=4.17, P<0.01           |
|                                           |                                                                  |                                         | <i>Cat</i> : df=6, t=2.82, P=0.030           |
|                                           |                                                                  |                                         | <i>Sod1</i> : df=6, t=3.34, P=0.016          |
| Figure 6C                                 | <i>Grm5<sup>+/+</sup></i> , n=5; <i>Grm5<sup>-/-</sup></i> , n=5 | Unpaired t-test, two-sided              | df=8, t=2.63, P=0.030                        |
| Figure 6D                                 | <i>Grm5<sup>+/+</sup></i> , n=5; <i>Grm5<sup>-/-</sup></i> , n=5 | Unpaired t-test, two-sided              | df=8, t=4.05, P<0.01                         |
| Figure 6G                                 | 3 biologic replicates                                            | One-way ANOVA with multiple comparisons | <i>Daglb</i> (HSCs):                         |
|                                           |                                                                  |                                         | Column B vs. A, q=5.23, adjusted P<0.01      |
|                                           |                                                                  |                                         | Column B vs. C, q=6.13, adjusted P<0.01      |
|                                           |                                                                  |                                         | <i>Srebf1</i> (HEPs):                        |
|                                           |                                                                  |                                         | Column B vs. A, q=4.04, adjusted P<0.05      |
|                                           |                                                                  |                                         | Column B vs. C, q=4.82, adjusted P<0.01      |
|                                           |                                                                  |                                         | <i>Fasn</i> (HEPs):                          |
|                                           |                                                                  |                                         | Column B vs. A, q=17.02, adjusted P<0.001    |
| Column B vs. C, q=11.66, adjusted P<0.001 |                                                                  |                                         |                                              |
| Figure 6K                                 | Veh, n=3; CTEP, n=3                                              | Unpaired t-test, two-sided              | <i>Cnrl1</i> : df=4, t=7.81, P<0.01          |
|                                           |                                                                  |                                         | <i>Srebf1</i> : df=4, t=2.86, P=0.046        |
|                                           |                                                                  |                                         | <i>Fasn</i> : df=4, t=3.05, P=0.038          |
|                                           |                                                                  |                                         | <i>Scd1</i> : df=4, t=7.18, P<0.01           |
| Figure 7A                                 | Healthy, n=4; AWLD, n=8;<br>AWLD, 6 ALH, 6 ALG                   | One-way ANOVA with multiple comparisons | Column A vs. C, q=2.72, adjusted P<0.05      |
|                                           |                                                                  |                                         | Column A vs. D, q=4.08, adjusted P<0.01      |
| Figure 7B                                 | Alcohol patients, n=33                                           | Linear regression                       | r <sup>2</sup> =0.21, P=0.01                 |

|           |                        |                            |                                              |
|-----------|------------------------|----------------------------|----------------------------------------------|
| Figure 7C | Control, n=4; AFL, n=4 | Unpaired t-test, two-sided | <i>CBS</i> : df=6, t=3.09, P=0.022           |
|           |                        |                            | <i>CTH</i> : df=6, t=3.75, P<0.01            |
|           |                        |                            | <i>GCLC</i> : df=6, t=3.35, P=0.015          |
|           |                        |                            | <i>SLC7A11</i> : df=6, t=3.52, P=0.013       |
|           |                        |                            | <i>GRM5</i> : df=6, t=3.74, P<0.01           |
|           |                        |                            | <i>CNRI</i> : df=6, t=3.09, P=0.021          |
|           |                        |                            | <i>SREBF1</i> : df=6, t=4.58, P<0.01         |
|           |                        |                            | <i>FASN</i> : df=6, t=3.90, P<0.01           |
| Figure 7D | Control, n=4; AFL, n=4 | Linear regression          | <i>CNRI</i> : r <sup>2</sup> =0.99, P<0.001  |
|           |                        |                            | <i>SREBF1</i> : r <sup>2</sup> =0.42, P=0.08 |
|           |                        |                            | <i>FASN</i> : r <sup>2</sup> =0.69, P=0.01   |
| Figure 7E | Control, n=4; AFL, n=4 | Unpaired t-test, two-sided | xCT: df=6, t=2.60, P=0.041                   |
|           |                        |                            | DAGLβ: df=6, t=2.54, P=0.044                 |
| Figure 7G | 3 biologic replicates  | Unpaired t-test, two-sided | df=4, t=17.16, P<0.001                       |
| Figure 7H | Veh, n=3; CHPG, n=3    | Unpaired t-test, two-sided | <i>GRM5</i> : df=4, t=8.33, P<0.01           |
|           |                        |                            | <i>DAGLB</i> : df=4, t=7.12, P<0.01          |

**Table S5. Related to STAR Methods. Summary of the statistics for the supplementary figures with statistical significance**

| Figures    | Sample (size)                          | Statistical method                      | Statistical values                                    |
|------------|----------------------------------------|-----------------------------------------|-------------------------------------------------------|
| Figure S1H | Pair, n=4; EtOH, n=4                   | Unpaired t-test, two-sided              | <i>Nfe2l2</i> : df=6, t=5.26, P<0.01                  |
|            |                                        |                                         | <i>Gclc</i> : df=6, t=3.36, P=0.015                   |
|            |                                        |                                         | <i>Gss</i> : df=6, t=11.26, P<0.001                   |
| Figure S2C | Pair, n=4; EtOH, n=6                   | Unpaired t-test, two-sided              | <i>Mat1a</i> : df=8, t=7.36, P<0.001                  |
|            |                                        |                                         | <i>Mat2a</i> : df=8, t=7.13, P<0.001                  |
|            |                                        |                                         | <i>Mat1a</i> vs <i>Mat2a</i> : df=6, t=13.93, P<0.001 |
|            |                                        |                                         | <i>Bhmt</i> : df=8, t=3.06, P=0.016                   |
|            |                                        |                                         | <i>Mtr</i> : df=10, t=4.72, P<0.001                   |
|            |                                        |                                         | <i>Bhmt</i> vs <i>Mtr</i> : df=6, t=10.21, P<0.001    |
| Figure S2D | Ctrl, n=3; EtOH, n=3                   | Unpaired t-test, two-sided              | <i>Mat1a</i> : df=4, t=3.39, P=0.018                  |
|            |                                        |                                         | <i>Mat2a</i> : df=4, t=3.55, P=0.024                  |
|            |                                        |                                         | <i>Mat1a</i> vs <i>Mat2a</i> : df=2, t=43.25, P<0.001 |
|            |                                        |                                         | <i>Bhmt</i> : df=4, t=30.4, P<0.001                   |
|            |                                        |                                         | <i>Bhmt</i> vs <i>Mtr</i> : df=2, t=99.8, P<0.001     |
| Figure S2E | 3 biologic replicates                  | One-way ANOVA with multiple comparisons | Column B vs. C: q=6.91, adjusted P=0.033              |
| Figure S3E | 3 biologic replicates                  | One-way ANOVA with multiple comparisons | Column B vs. A: q=4.04, adjusted P=0.014              |
| Figure S3F | 3 biologic replicates                  | One-way ANOVA with multiple comparisons | Column B vs. C: q=11.32, adjusted P<0.001             |
|            |                                        |                                         | <i>Daglb</i> :                                        |
|            |                                        |                                         | Column B vs. A: q=5.66, adjusted P=0.011              |
|            |                                        |                                         | Column B vs. C: q=8.76, adjusted P<0.01               |
| Figure S3G | 4 biologic replicates                  | One-way ANOVA with multiple comparisons | Column B vs. D: q=9.18, adjusted P<0.01               |
|            |                                        |                                         | <i>Grm5</i> : q=7.06, adjusted P<0.01                 |
|            |                                        |                                         | <i>Slc7a11</i> :                                      |
| Figure S3H | 4 biologic replicates                  | One-way ANOVA with multiple comparisons | Column A vs. B: q=13.07, adjusted P<0.001             |
|            |                                        |                                         | Column A vs. C: q=12.61, adjusted P<0.001             |
|            |                                        |                                         | Column A vs. B: q=4.33, adjusted P=0.033              |
| Figure S4C | Ctrl, n=4; shRNA, n=4                  | Unpaired t-test, two-sided              | Column B vs. C: q=13.69, adjusted P<0.001             |
|            |                                        |                                         | Column B vs. C: q=9.36, adjusted P<0.001              |
|            |                                        |                                         | <i>Scd1</i> : df=7, t=2.68, P=0.032                   |
|            |                                        |                                         | <i>Cat</i> : df=6, t=2.76, P=0.033                    |
|            | Veh, n=4; SSZ, n=4                     | Unpaired t-test, two-sided              | <i>Sod1</i> : df=7, t=6.10, P<0.001                   |
| Figure S4D | Veh, n=4; SSZ, n=4                     | Unpaired t-test, two-sided              | <i>Sod2</i> : df=6, t=3.26, P=0.017                   |
|            |                                        |                                         | <i>Scd1</i> : df=4, t=5.48, P<0.01                    |
| Figure S4H | Ctrl, n=3; AlbCre, n=3                 | Unpaired t-test, two-sided              | <i>Cat</i> : df=4, t=2.88, P=0.045                    |
| Figure S4I | Veh, n=4; SSZ, n=4                     | Unpaired t-test, two-sided              | <i>Il1b</i> : df=4, t=2.50, P=0.047                   |
| Figure S4J | Ctrl, n=3; AlbCre, n=3                 | Unpaired t-test, two-sided              | <i>Tnf</i> : df=6, t=3.05, P=0.022                    |
| Figure S5C | 3 biologic replicates                  | Unpaired t-test, two-sided              | <i>Grm5</i> : Column A vs. B: df=2, t=5.88, P=0.028   |
| Figure S5F | HSC- <i>Grm5</i> <sup>+/+</sup> , n=5; | Unpaired t-test, two-sided              | Serum TG: df=8, t=2.82, P=0.022                       |
|            | HSC- <i>Grm5</i> <sup>-/-</sup> , n=5  |                                         |                                                       |
|            | (2 biologic replicates)                |                                         |                                                       |
| Figure S5G | HSC- <i>Grm5</i> <sup>+/+</sup> , n=5; | Unpaired t-test, two-sided              | Liver 2-AG: df=8, t=3.23, P=0.012                     |
|            | HSC- <i>Grm5</i> <sup>-/-</sup> , n=5; |                                         |                                                       |
|            | (2 biologic replicates)                |                                         |                                                       |
| Figure S5I | HSC- <i>Grm5</i> <sup>+/+</sup> , n=5; | Unpaired t-test, two-sided              | Liver TG: df=8, t=4.01, P<0.01                        |
|            | HSC- <i>Grm5</i> <sup>-/-</sup> , n=5; |                                         |                                                       |
|            | (2 biologic replicates)                |                                         |                                                       |
| Figure S5J | HSC- <i>Grm5</i> <sup>+/+</sup> , n=3; | Unpaired t-test, two-sided              | Oil red O: df=8, t=4.13, P<0.01                       |
|            | HSC- <i>Grm5</i> <sup>-/-</sup> , n=3; |                                         |                                                       |
|            | (2 biologic replicates)                |                                         |                                                       |
| Figure S6A | Control, n=4; AFL, n=4                 | Unpaired t-test, two-sided              | <i>Srebfl1</i> : df=4, t=11.83, P<0.001               |
|            |                                        |                                         | <i>Fasn</i> : df=4, t=12.25, P<0.001                  |
|            |                                        |                                         | <i>Scd1</i> : df=4, t=20.92, P<0.001                  |
| Figure S6E | Healthy, n=7; AH, n=15                 | Unpaired t-test, one-sided              | <i>GRM5</i> : df=14, t=3.21, P<0.01                   |
| Figure S6F | 3 biologic replicates                  | Unpaired t-test, two-sided              | <i>SLC7A11</i> : df=20, t=1.80, P=0.043               |
| Figure S6G | 3 biologic replicates                  | Unpaired t-test, two-sided              | <i>GRM5</i> : df=2, t=8.35, P=0.014                   |
| Figure S6H | 3 biologic replicates                  | Unpaired t-test, two-sided              | <i>DAGLB</i> : df=2, t=8.56, P=0.013                  |
| Figure S6I | 3 biologic replicates                  | One-way ANOVA with multiple comparisons | Hep3B : Column A vs. C: q=8.13, adjusted P<0.01       |
